# Supplementary material for: Synergism of a Novel 1,2,4-oxadiazole-containing Derivative with Oxacillin against Methicillin-Resistant Staphylococcus aureus
Source: MDPI journal article supplement (doi:10.3390/antibiotics10101258), 2021-10-16

## Supplementary data

Synergistic activity of a synthetic 1,2,4-oxadiazole-containing derivative and oxacillin against methicillin-resistant *Staphylococcus aureus*

Elisabetta Buommino <sup>1,†</sup>, Simona De Marino <sup>1,†</sup>, Martina Sciarretta <sup>1</sup>, Marialuisa Piccolo <sup>1</sup>, Carmen Festa <sup>1,\*</sup> and Maria Valeria D'Auria <sup>1</sup>

### Table of contents

|                                                                                      |    |
|--------------------------------------------------------------------------------------|----|
| 1. <sup>1</sup> H spectrum, mass spectrum and HPLC chromatogram of compound <b>3</b> | 2  |
| 2. <sup>1</sup> H and <sup>13</sup> C NMR spectra of compound <b>4</b>               | 3  |
| 3. <sup>1</sup> H and <sup>13</sup> C NMR spectra of compound <b>5</b>               | 4  |
| 4. <sup>1</sup> H and <sup>13</sup> C NMR spectra of compound <b>6</b>               | 5  |
| 5. <sup>1</sup> H and <sup>13</sup> C NMR spectra of compound <b>7</b>               | 6  |
| 6. <sup>1</sup> H and <sup>13</sup> C NMR spectra of compound <b>8</b>               | 7  |
| 7. <sup>1</sup> H and <sup>13</sup> C NMR spectra of compound <b>9</b>               | 8  |
| 8. <sup>1</sup> H and <sup>13</sup> C NMR spectra of compound <b>10</b>              | 9  |
| 9. <sup>1</sup> H and <sup>13</sup> C NMR spectra of compound <b>11</b>              | 10 |
| 10. <sup>1</sup> H and <sup>13</sup> C NMR spectra of compound <b>12</b>             | 11 |
| 11. Mass spectrum and HPLC chromatogram of compound <b>12</b>                        | 12 |
| 12. <sup>1</sup> H and <sup>13</sup> C NMR spectra of compound <b>13</b>             | 13 |
| 13. <sup>1</sup> H and <sup>13</sup> C NMR spectra of compound <b>14</b>             | 14 |
| 14. <sup>1</sup> H and <sup>13</sup> C NMR spectra of compound <b>15</b>             | 15 |
| 15. <sup>1</sup> H and <sup>13</sup> C NMR spectra of compound <b>16</b>             | 16 |
| 16. <sup>1</sup> H and <sup>13</sup> C NMR spectra of compound <b>17</b>             | 17 |

$^1\text{H}$  NMR of compound **3** (400 MHz,  $\text{CD}_3\text{OD}$ )

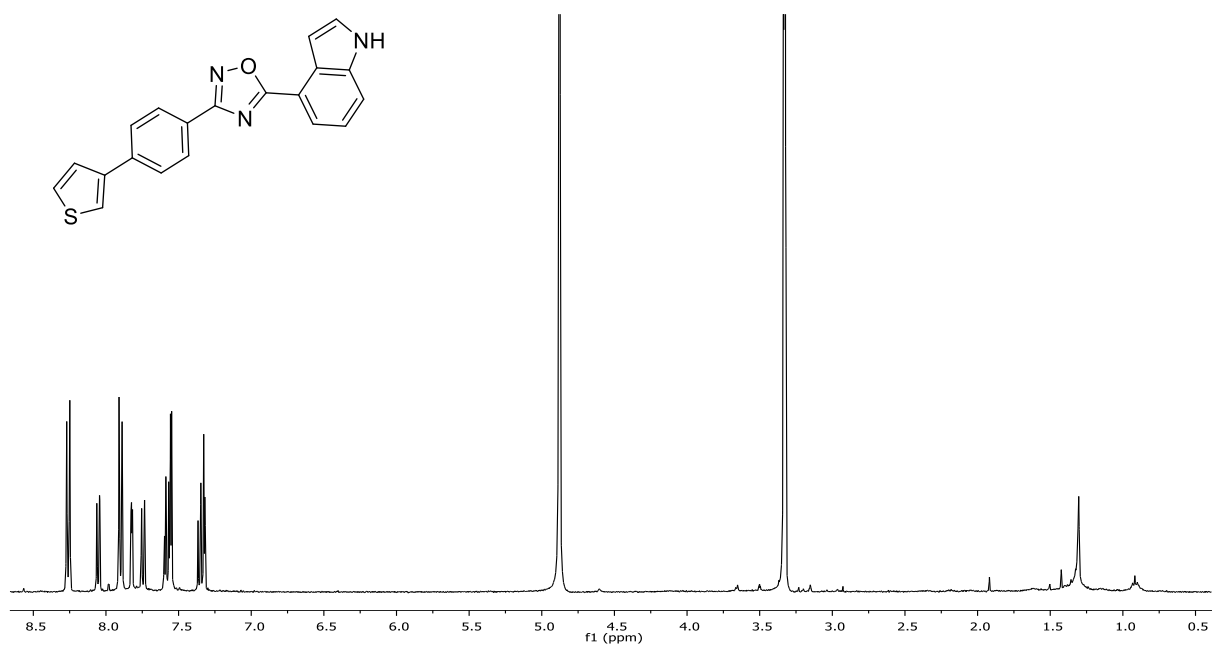

ESIMS spectrum of compound **3** (in positive mode)

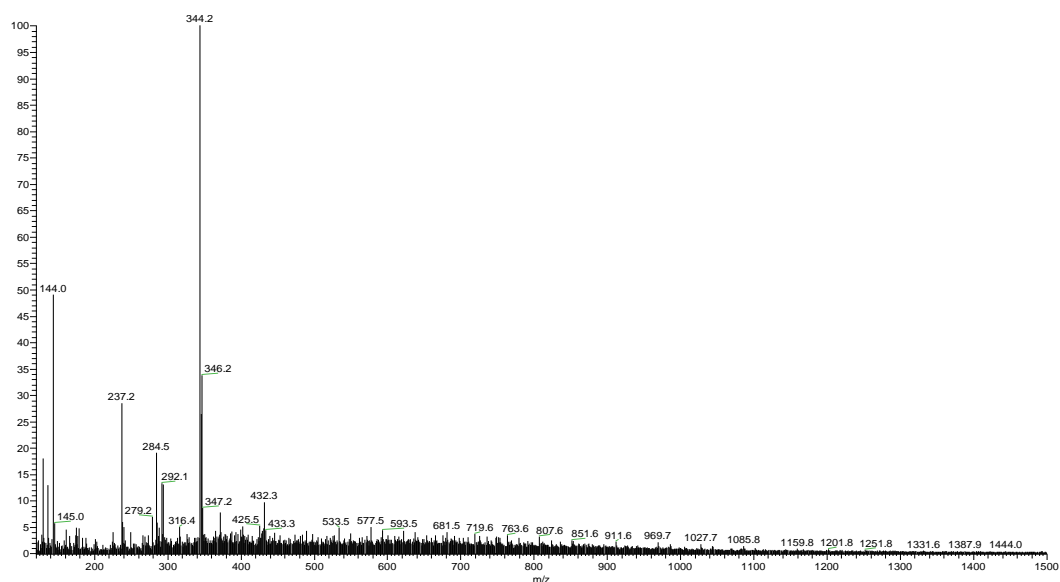

HPLC chromatogram of compound **3**

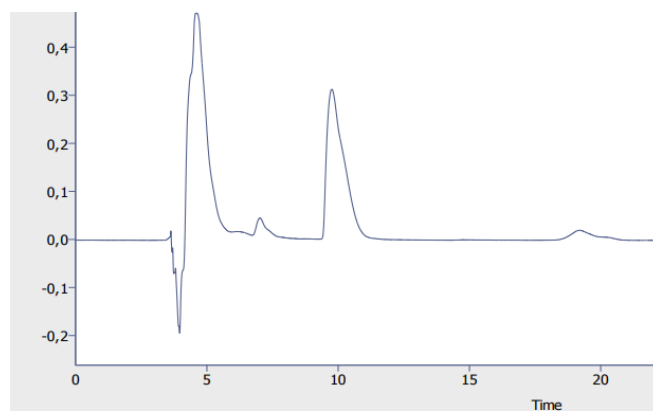

$^1\text{H}$  NMR of compound **4** (700 MHz,  $\text{CD}_3\text{OD}$ )

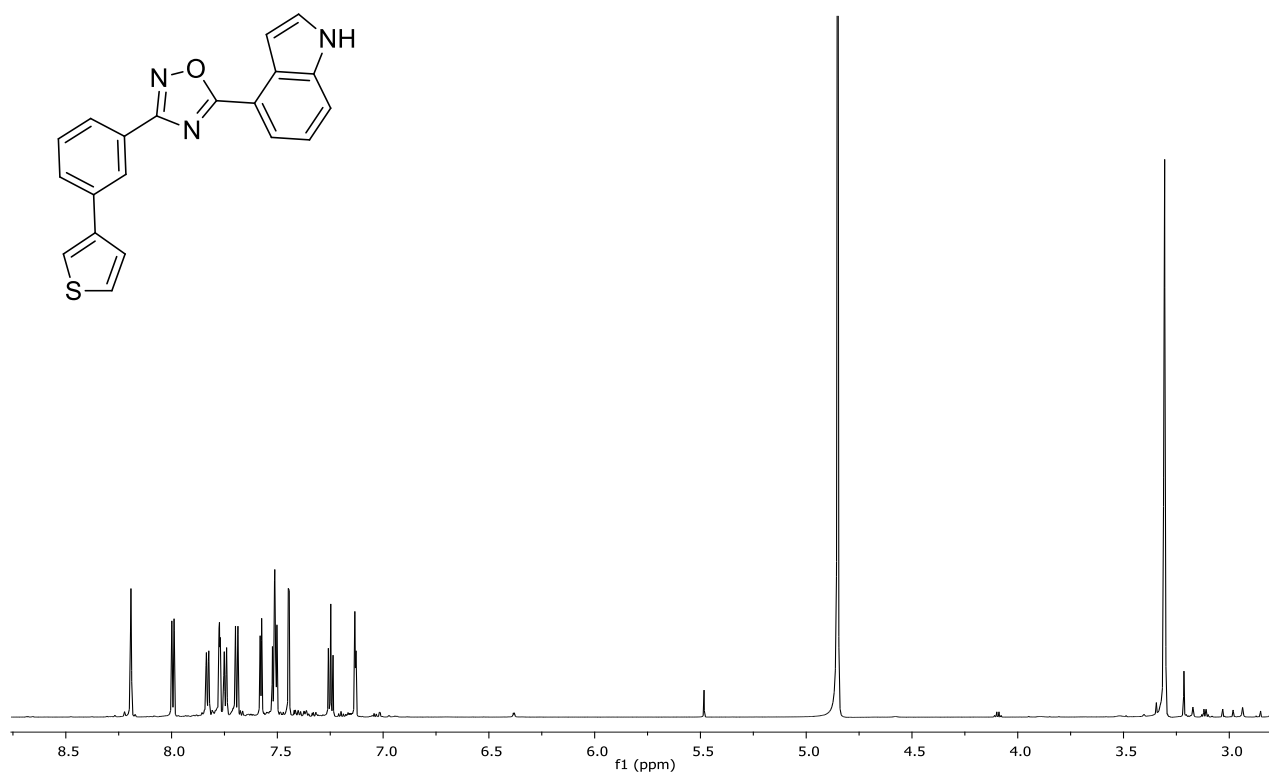

$^{13}\text{C}$  NMR of compound **4** (175 MHz,  $\text{CD}_3\text{OD}$ )

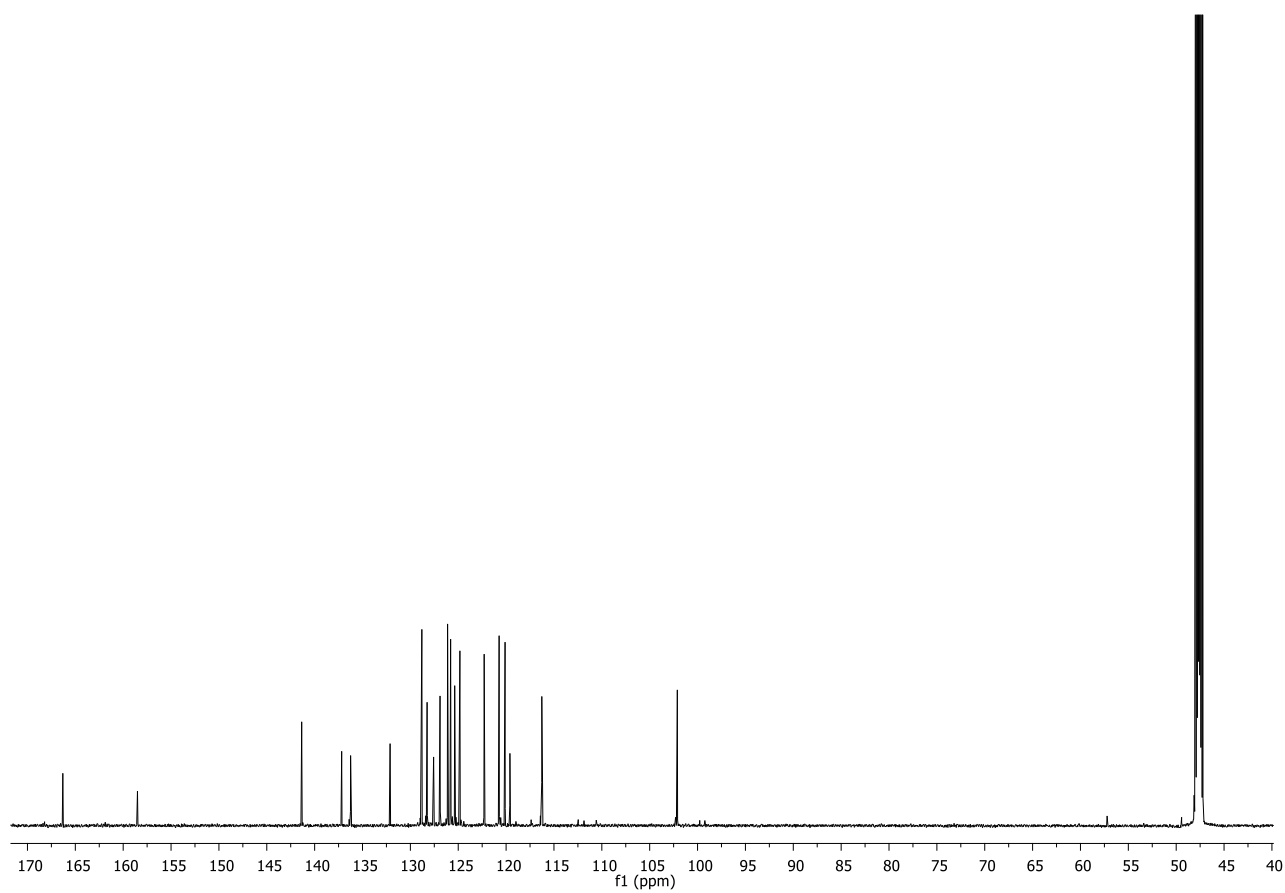

$^1\text{H}$  NMR of compound **5** (700 MHz,  $\text{CD}_3\text{OD}$ )

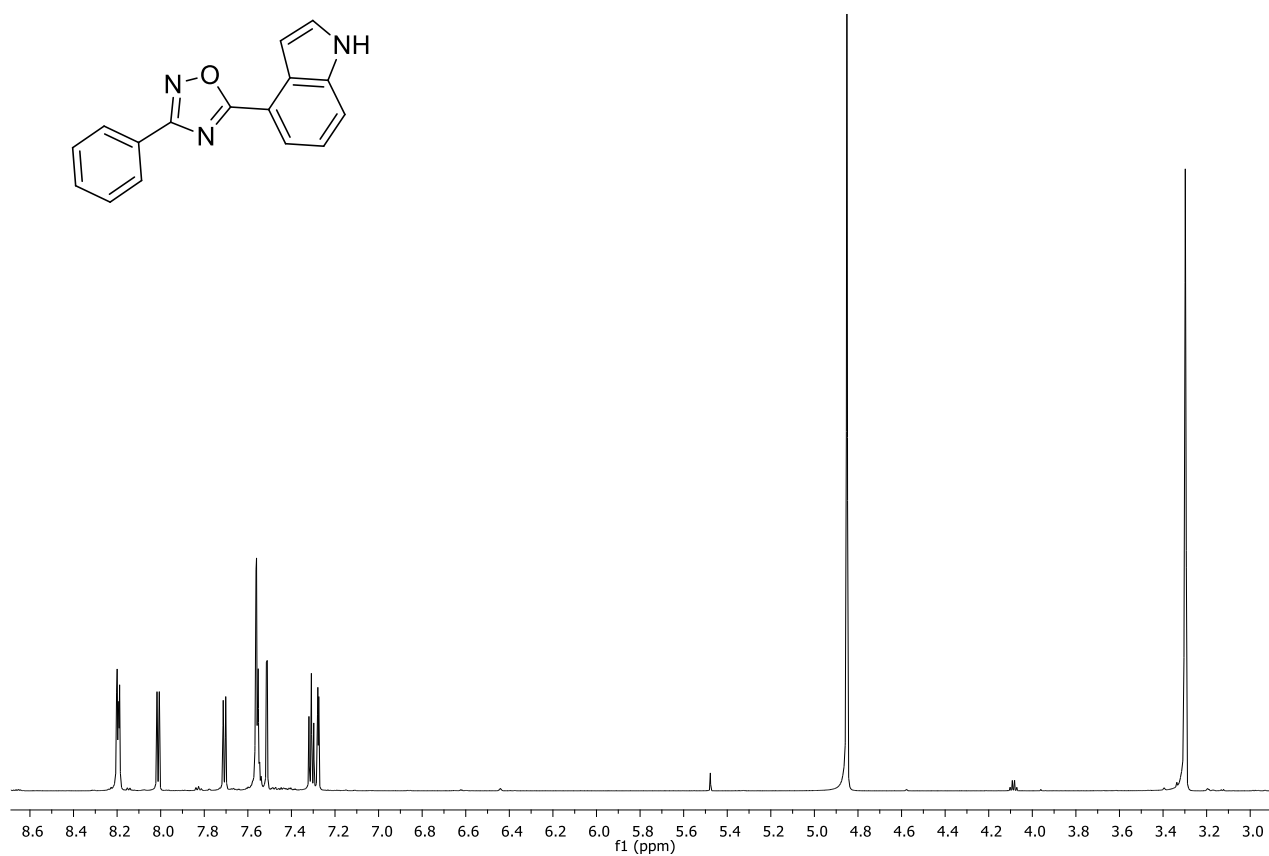

$^{13}\text{C}$  NMR of compound **5** (175 MHz,  $\text{CD}_3\text{OD}$ )

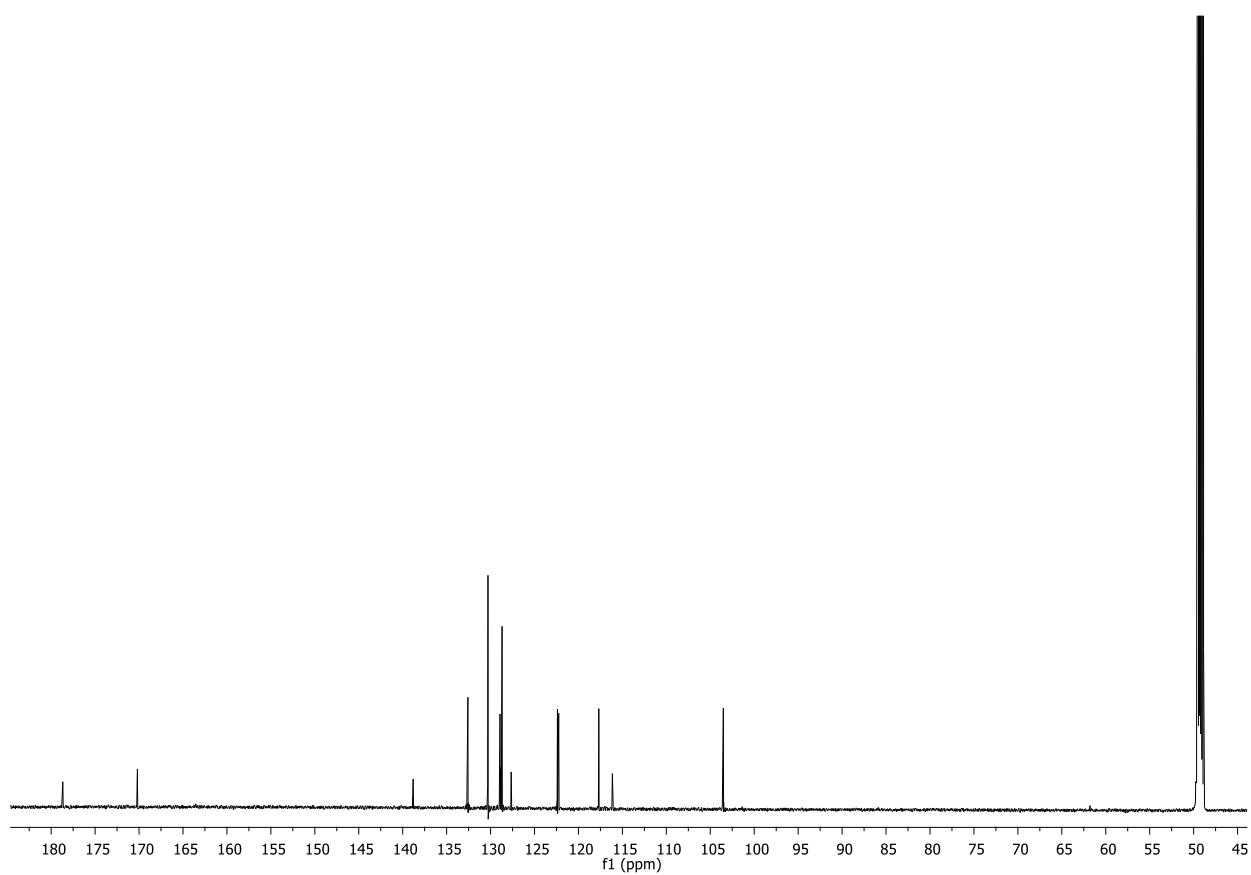

Fc1ccc(cc1)-c2nc3ccccc3o2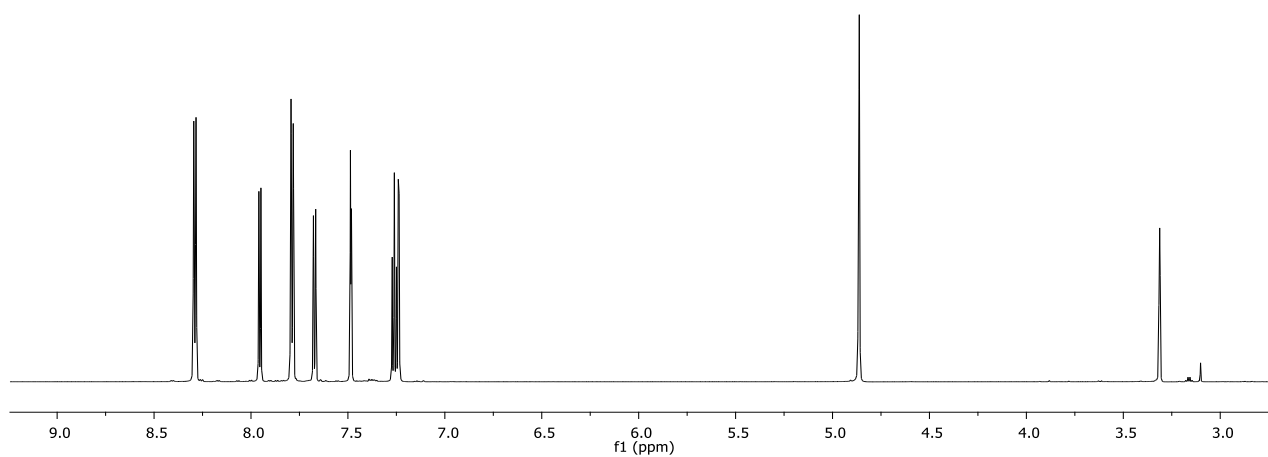

$^1\text{H}$  NMR of compound **7** (400 MHz,  $\text{CD}_3\text{OD}$ )

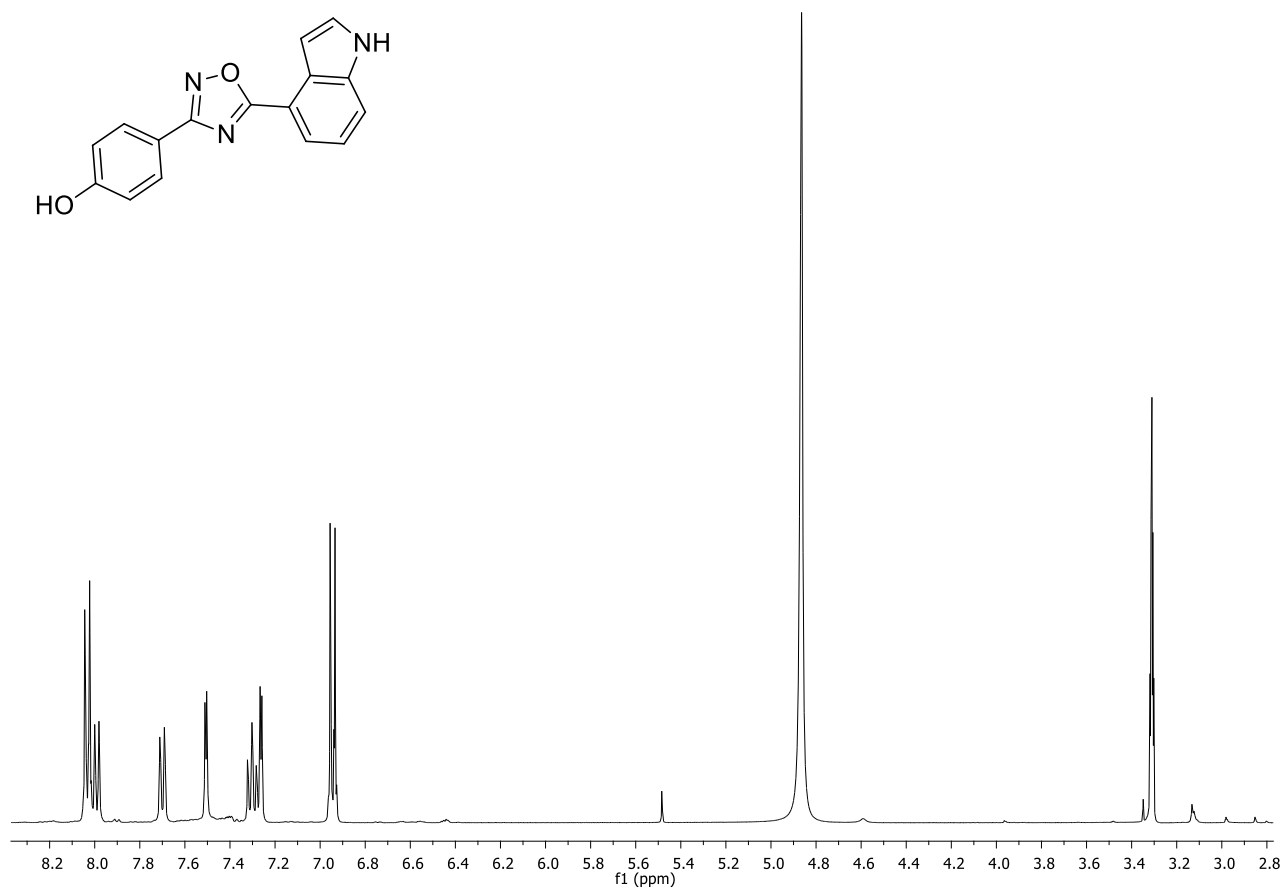

$^{13}\text{C}$  NMR of compound **7** (100 MHz,  $\text{CD}_3\text{OD}$ )

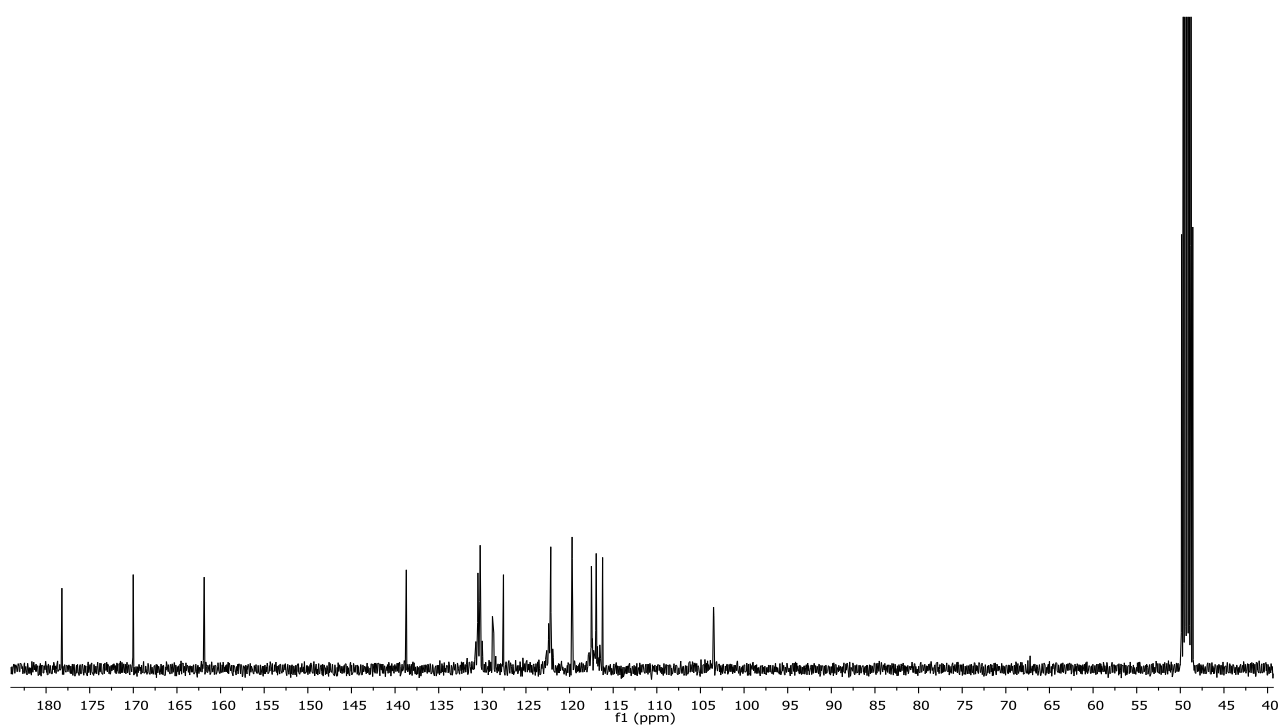

$^1\text{H}$  NMR of compound **8** (700 MHz,  $\text{CD}_3\text{OD}$ )

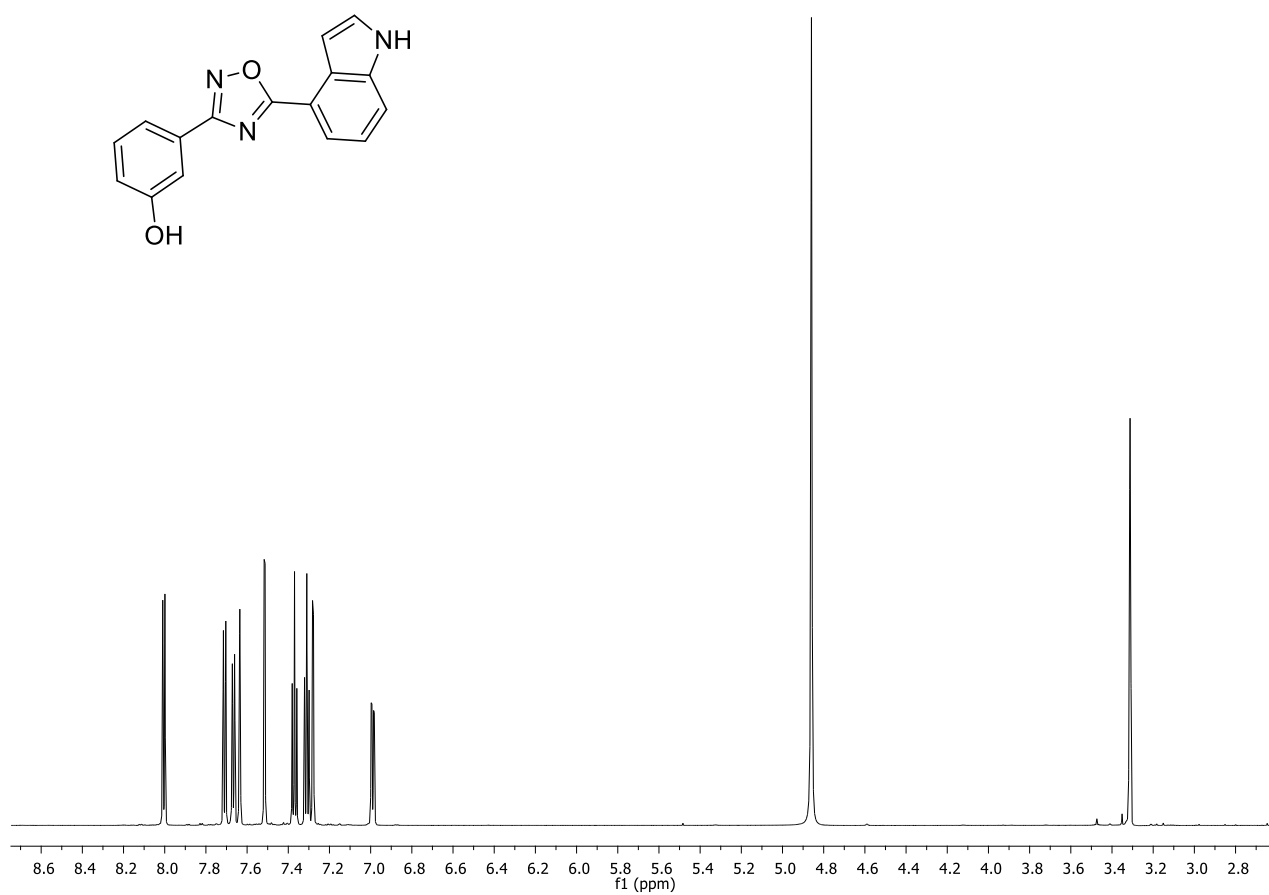

$^{13}\text{C}$  NMR of compound **8** (175 MHz,  $\text{CD}_3\text{OD}$ )

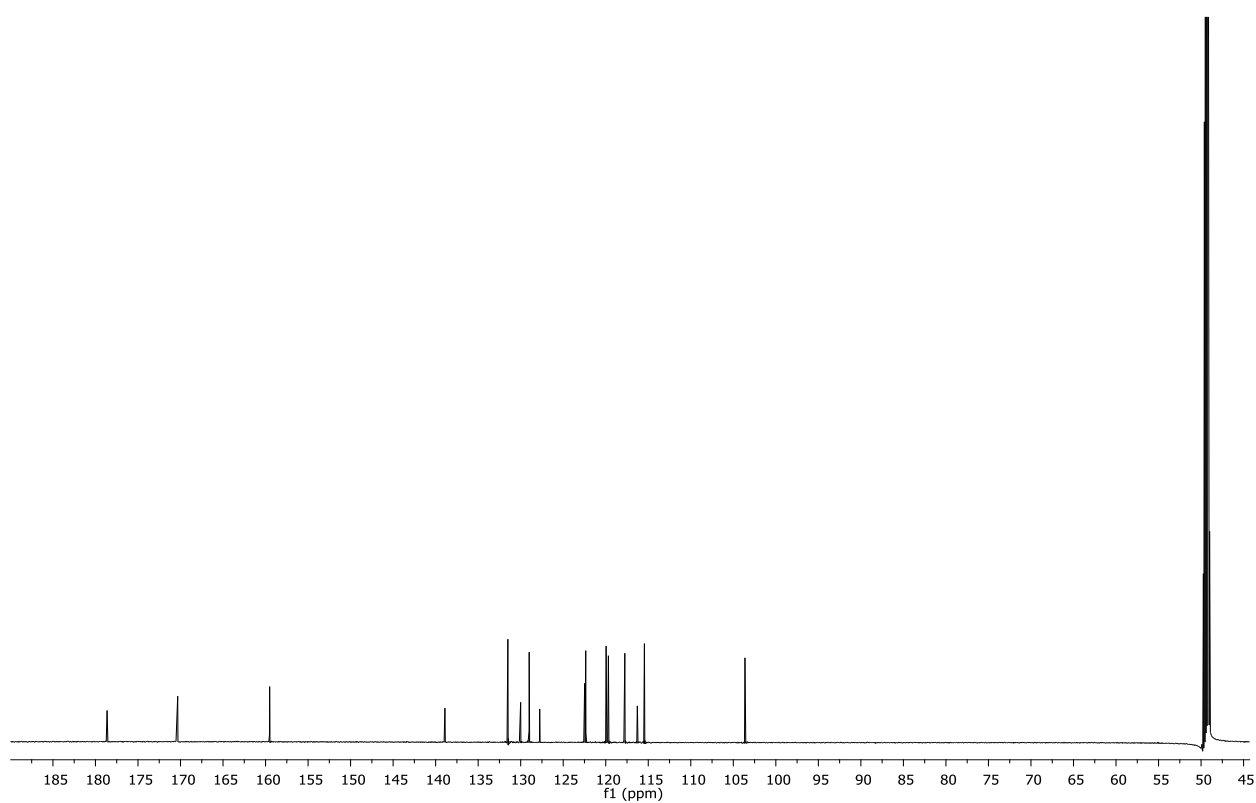

$^1\text{H}$  NMR of compound **9** (400 MHz,  $\text{CD}_3\text{OD}$ )

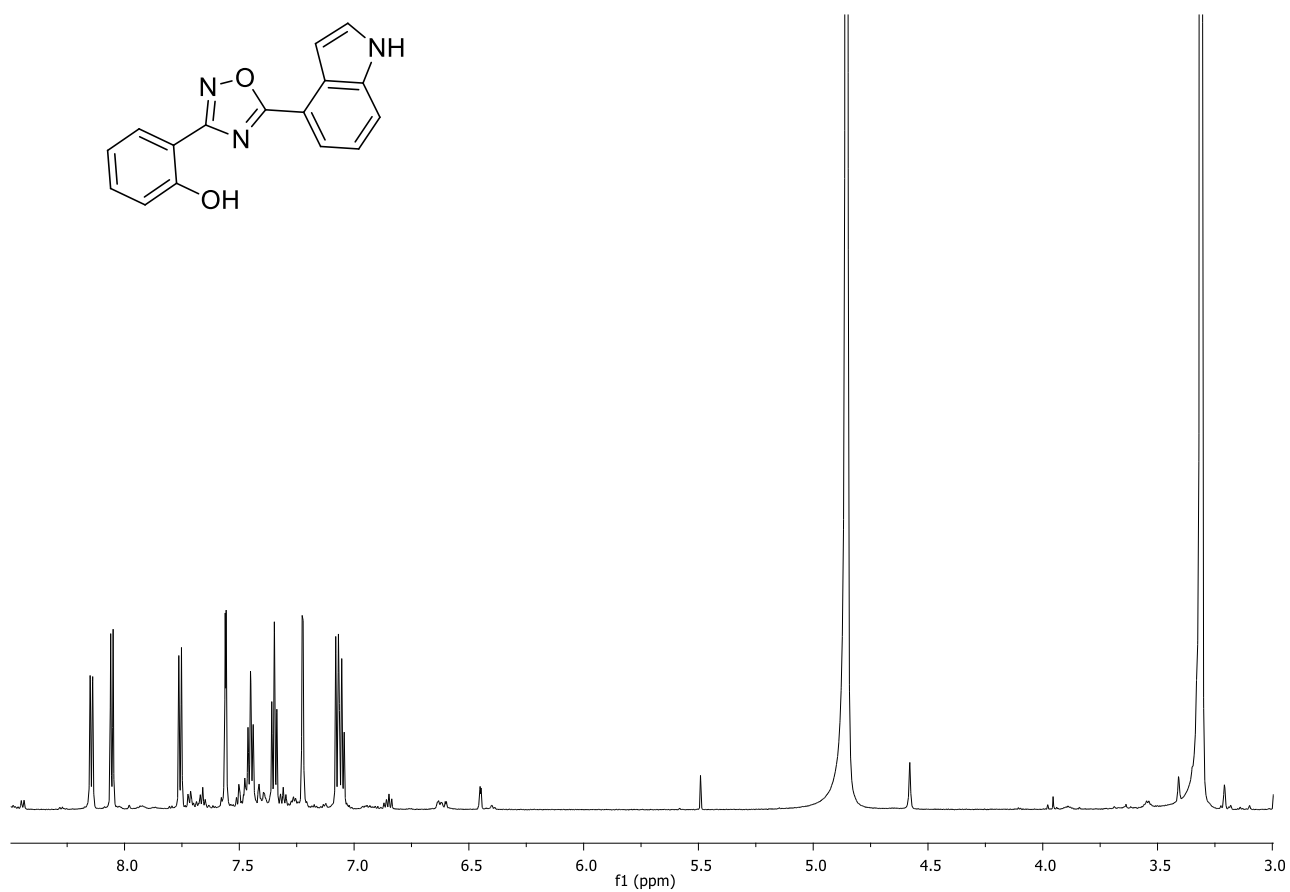

$^{13}\text{C}$  NMR of compound **9** (100 MHz,  $\text{CD}_3\text{OD}$ )

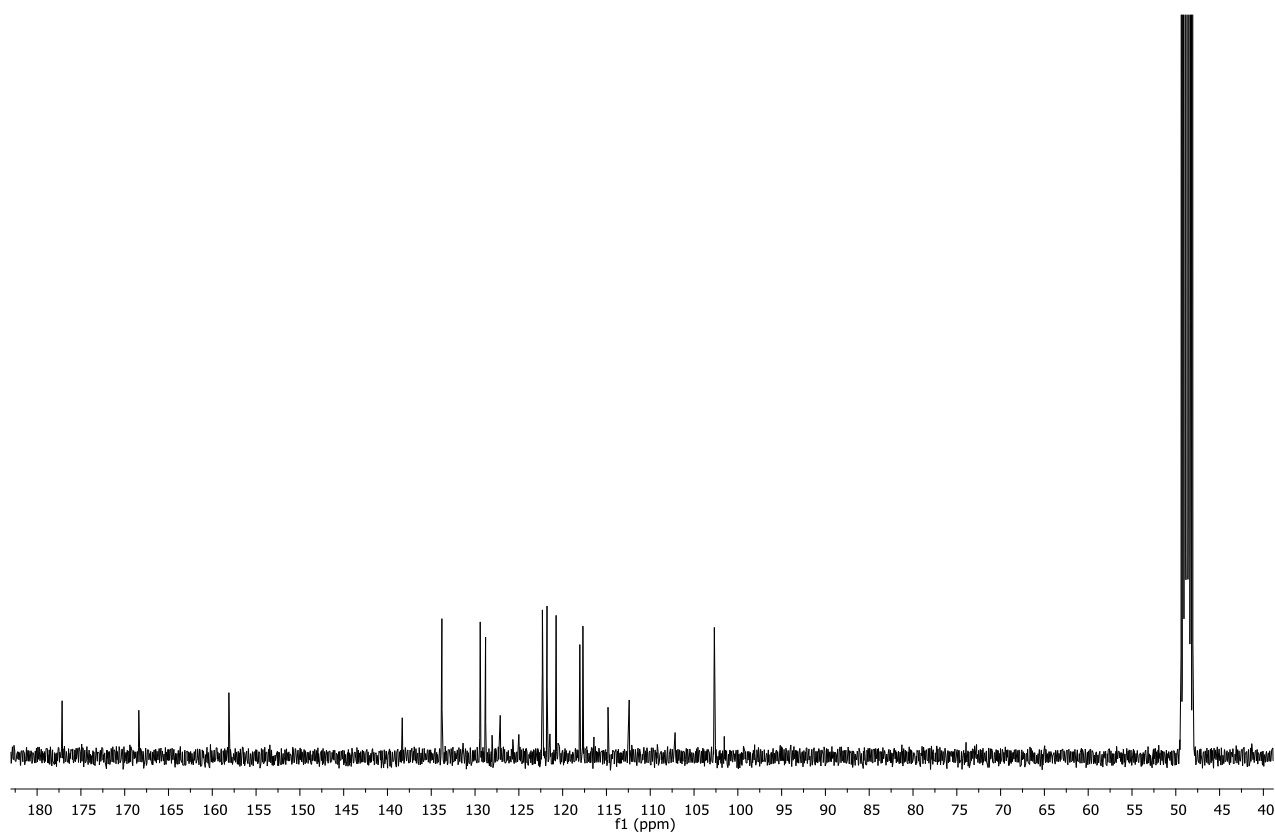

$^1\text{H}$  NMR of compound **10** (400 MHz,  $\text{CD}_3\text{OD}$ )

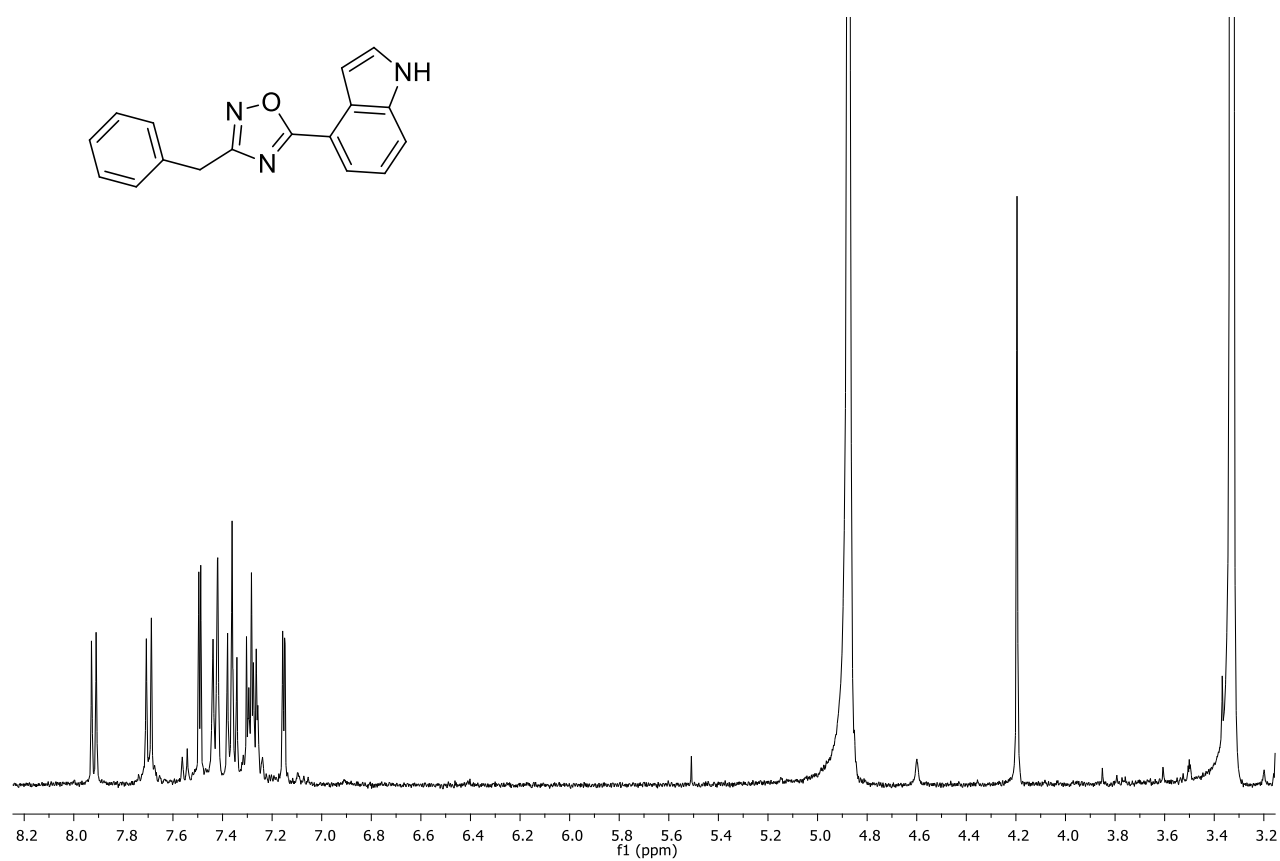

$^{13}\text{C}$  NMR of compound **10** (175 MHz,  $\text{CD}_3\text{OD}$ )

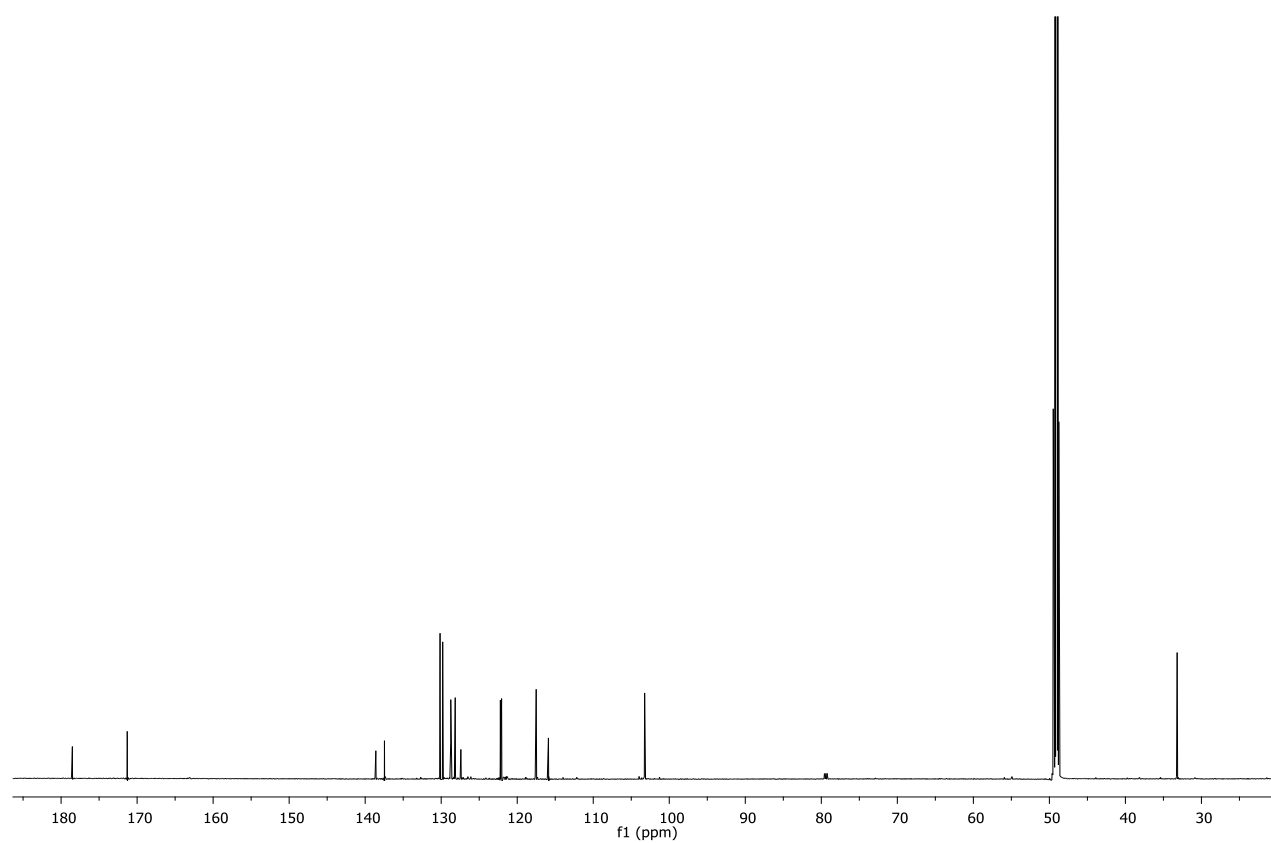

<sup>1</sup>H NMR of compound **11** (700 MHz, CD<sub>3</sub>OD)

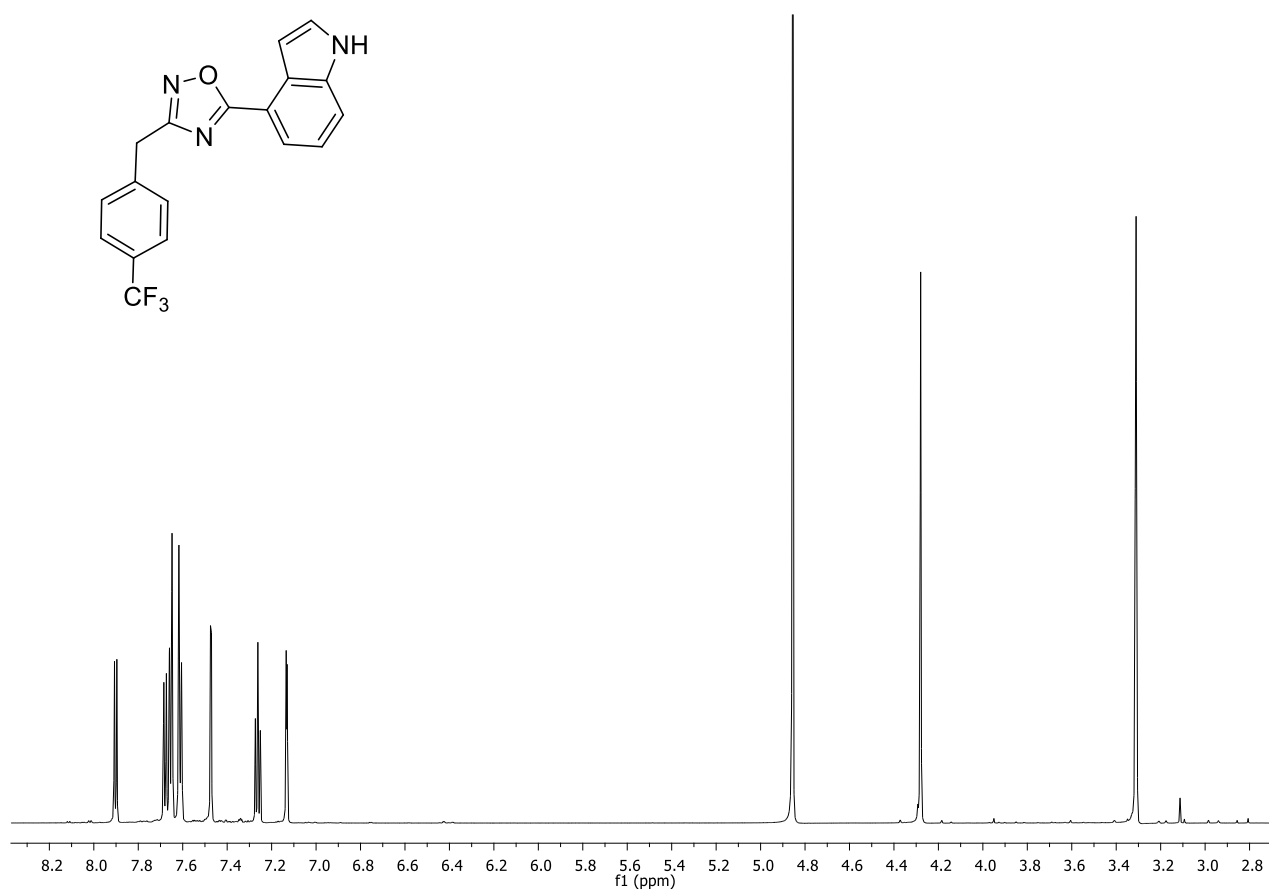

<sup>13</sup>C NMR of compound **11** (175 MHz, CD<sub>3</sub>OD)

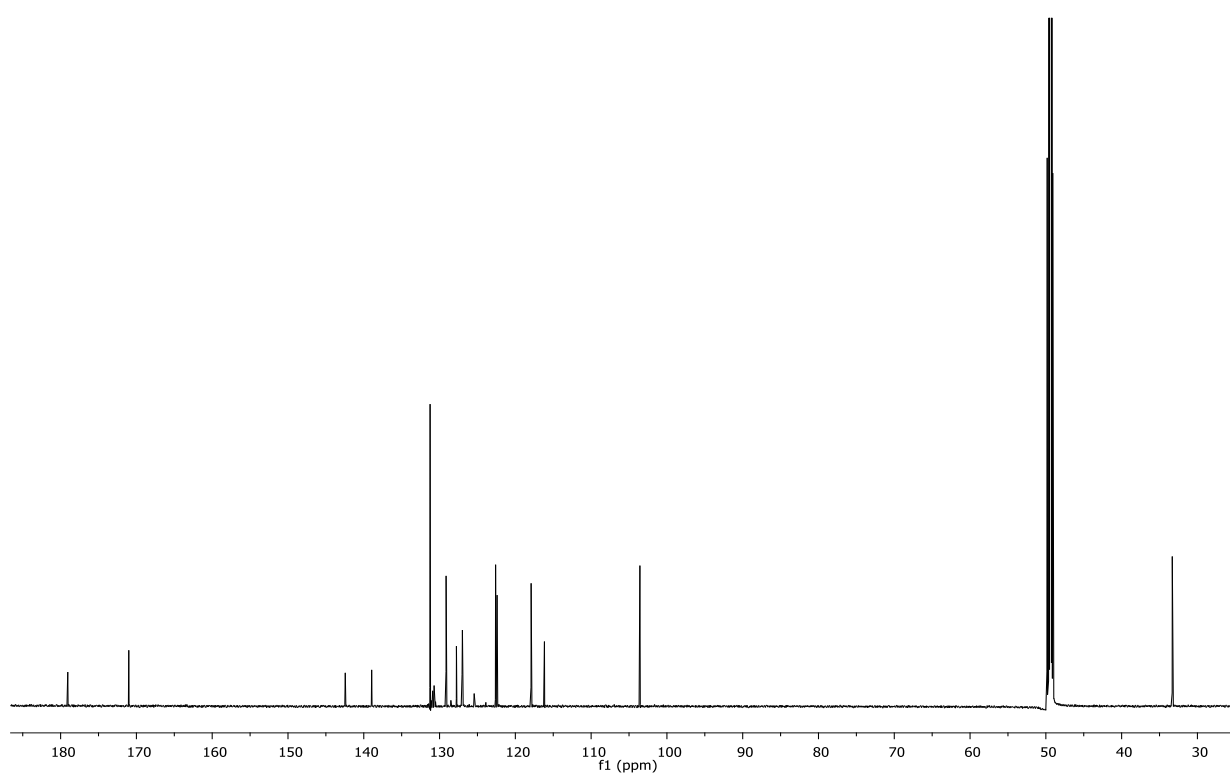

$^1\text{H}$  NMR of compound **12** (700 MHz,  $\text{CD}_3\text{OD}$ )

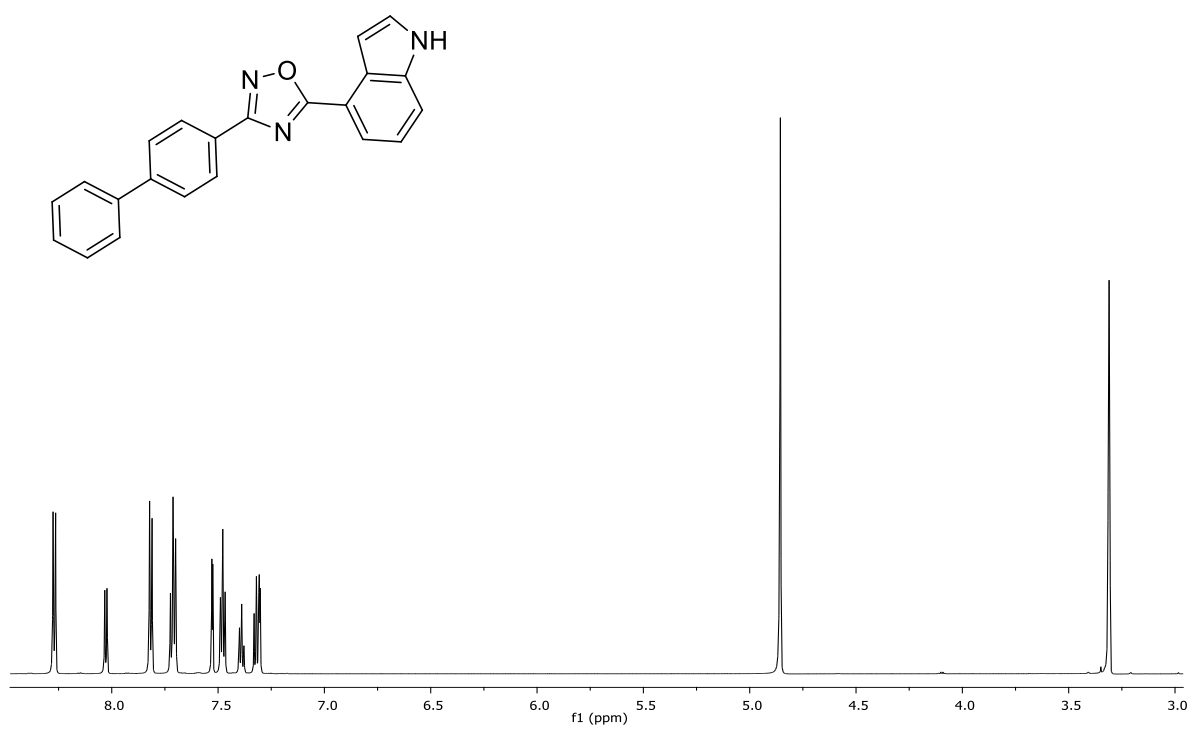

$^{13}\text{C}$  NMR of compound **12** (175 MHz,  $\text{CD}_3\text{OD}$ )

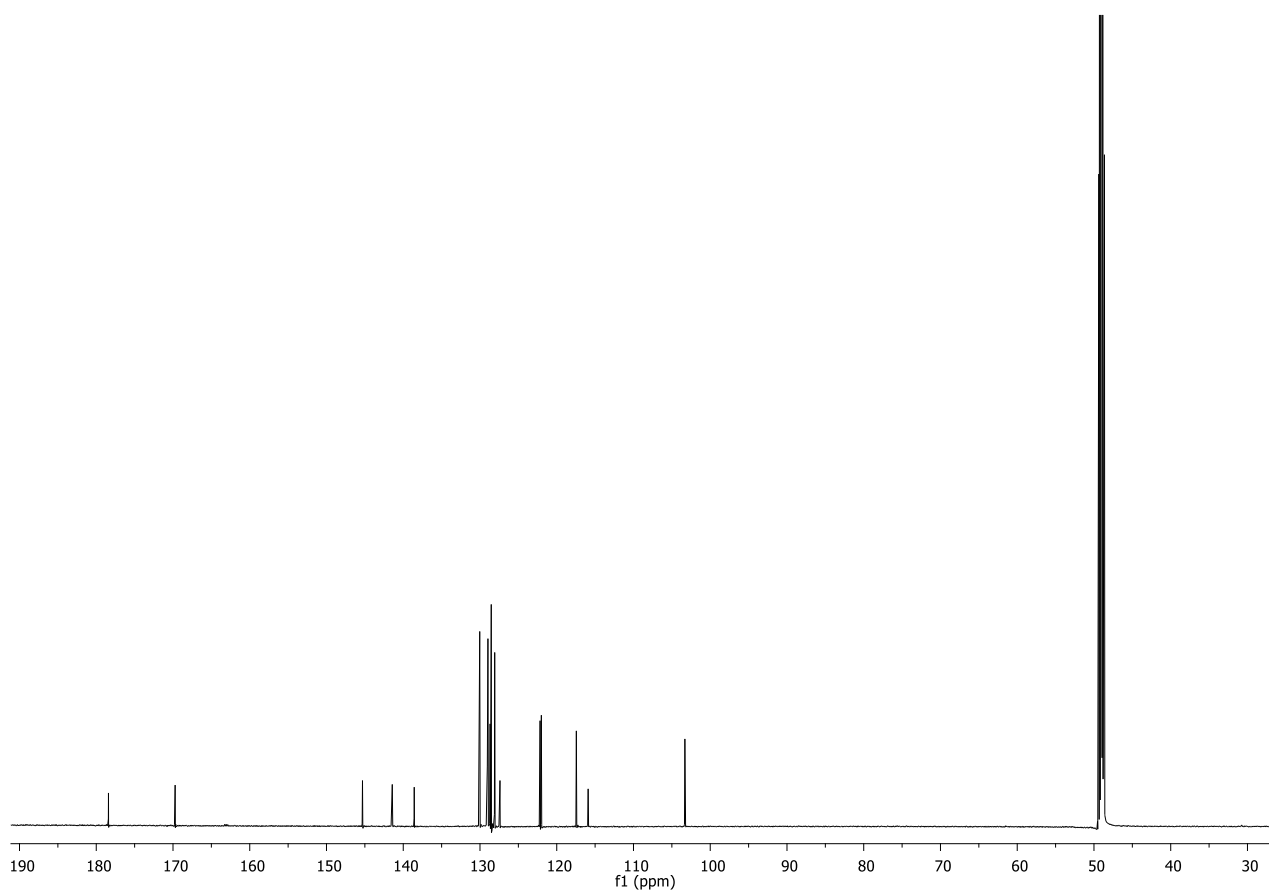

ESIMS spectrum of compound **12** (in positive mode)

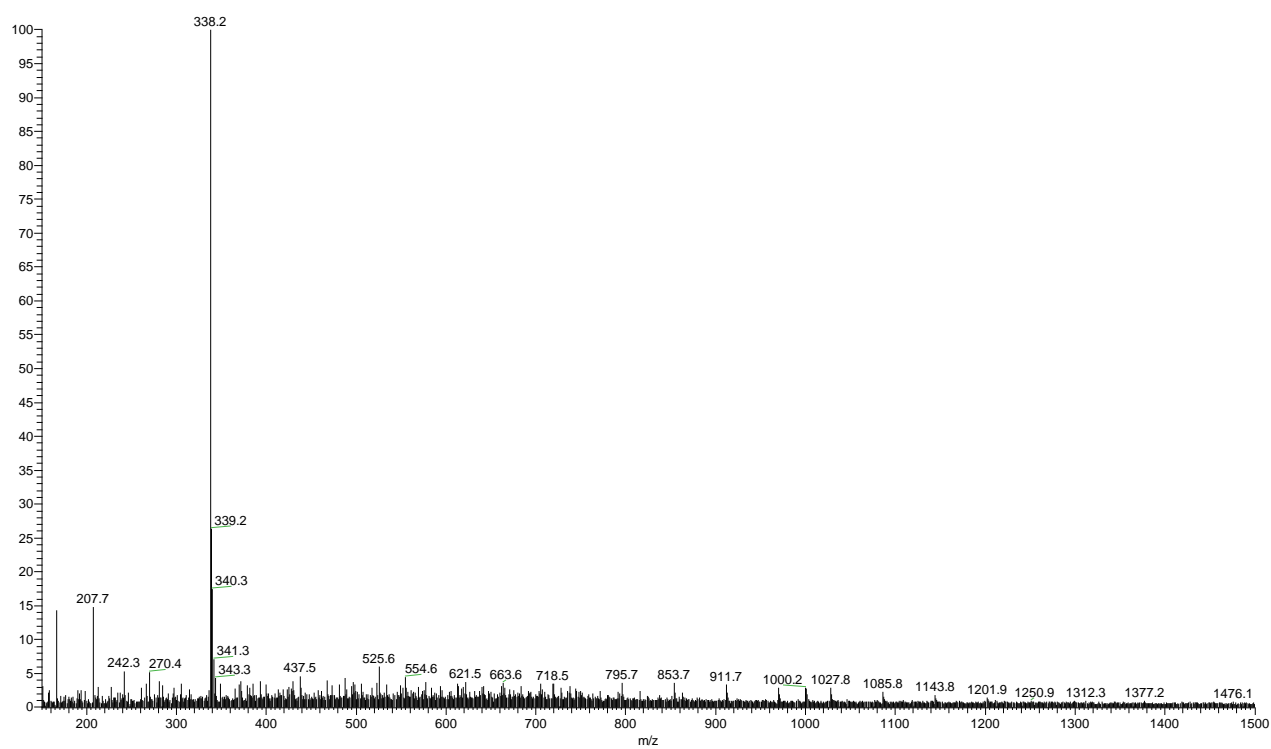

HPLC chromatogram of compound **12**

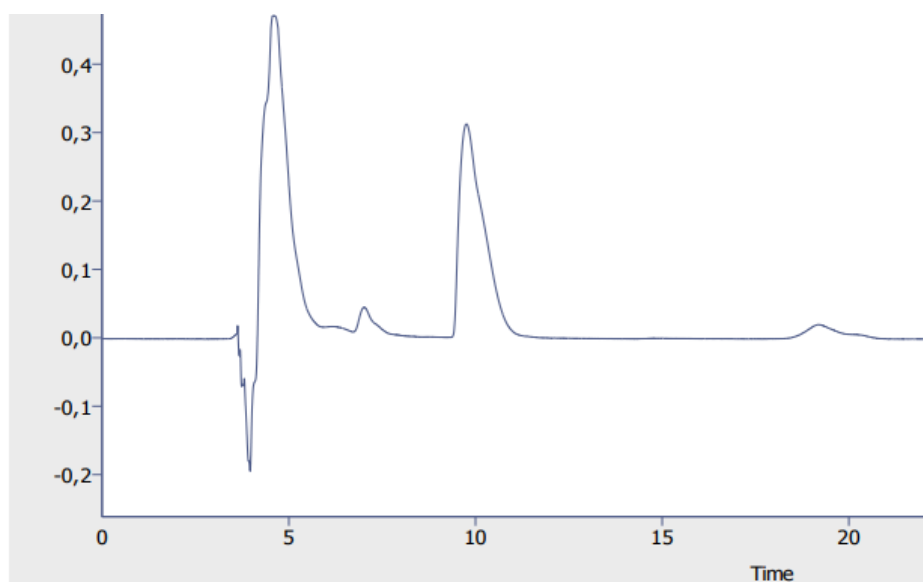

$^1\text{H}$  NMR of compound **13** (400 MHz,  $\text{CD}_3\text{OD}$ )

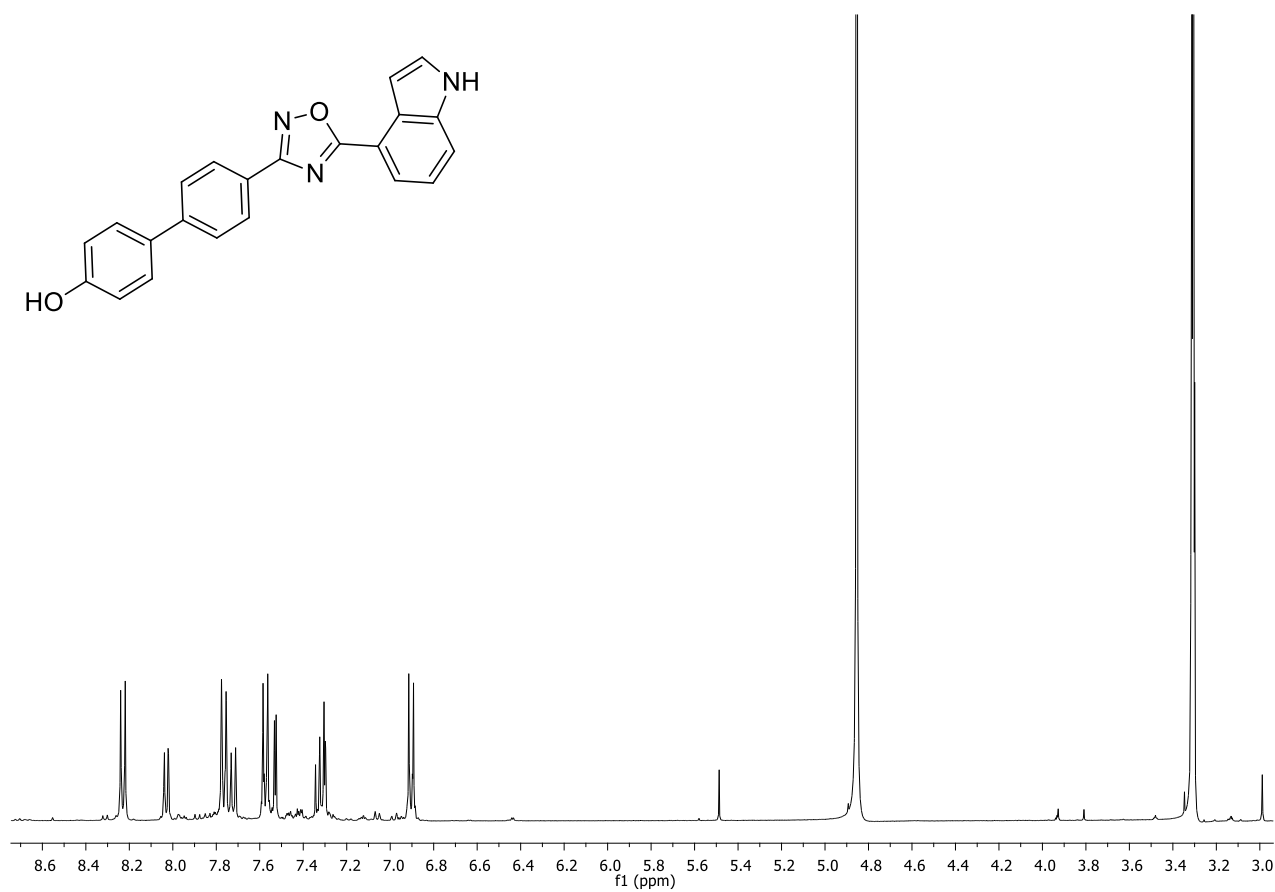

$^{13}\text{C}$  NMR of compound **13** (100 MHz,  $\text{CD}_3\text{OD}$ )

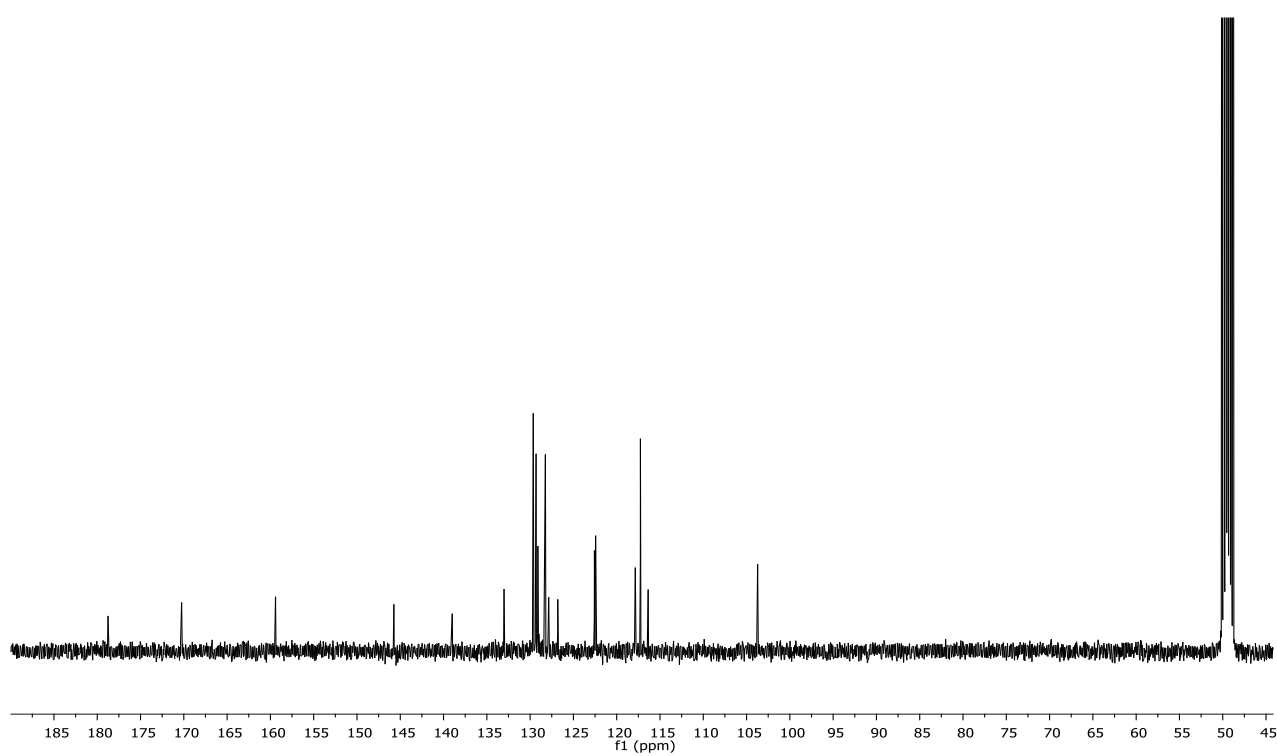

$^1\text{H}$  NMR of compound **14** (700 MHz,  $\text{CD}_3\text{OD}$ )

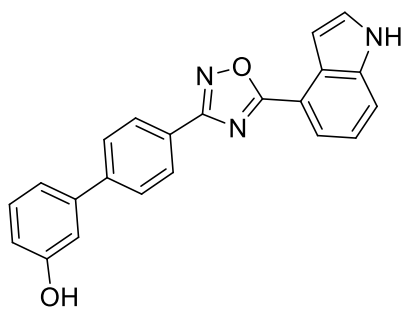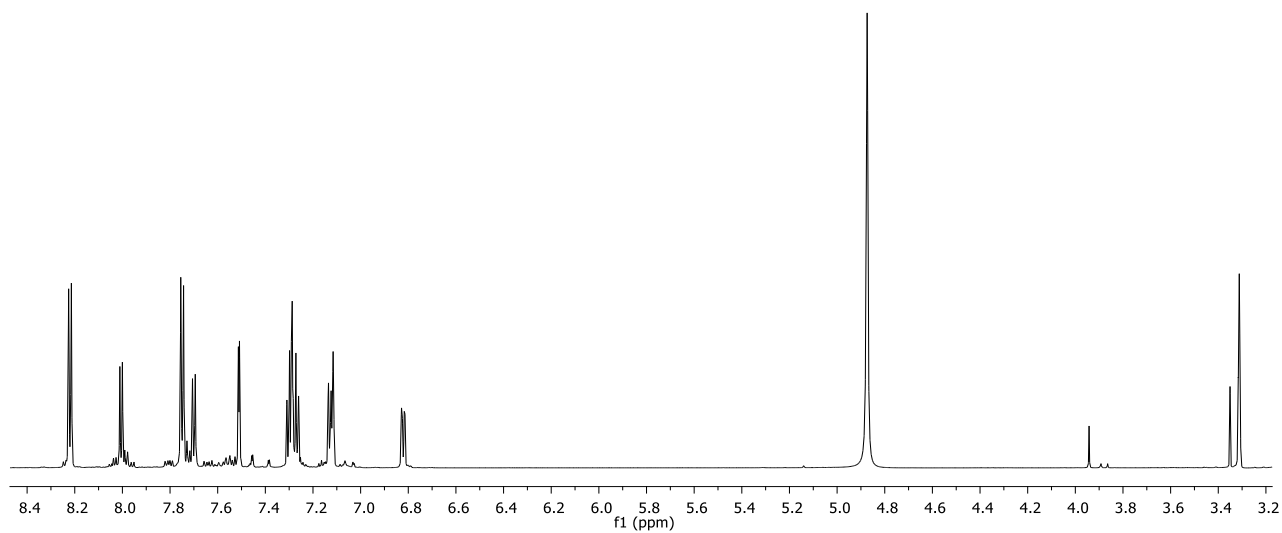

$^{13}\text{C}$  NMR of compound **14** (175 MHz,  $\text{CD}_3\text{OD}$ )

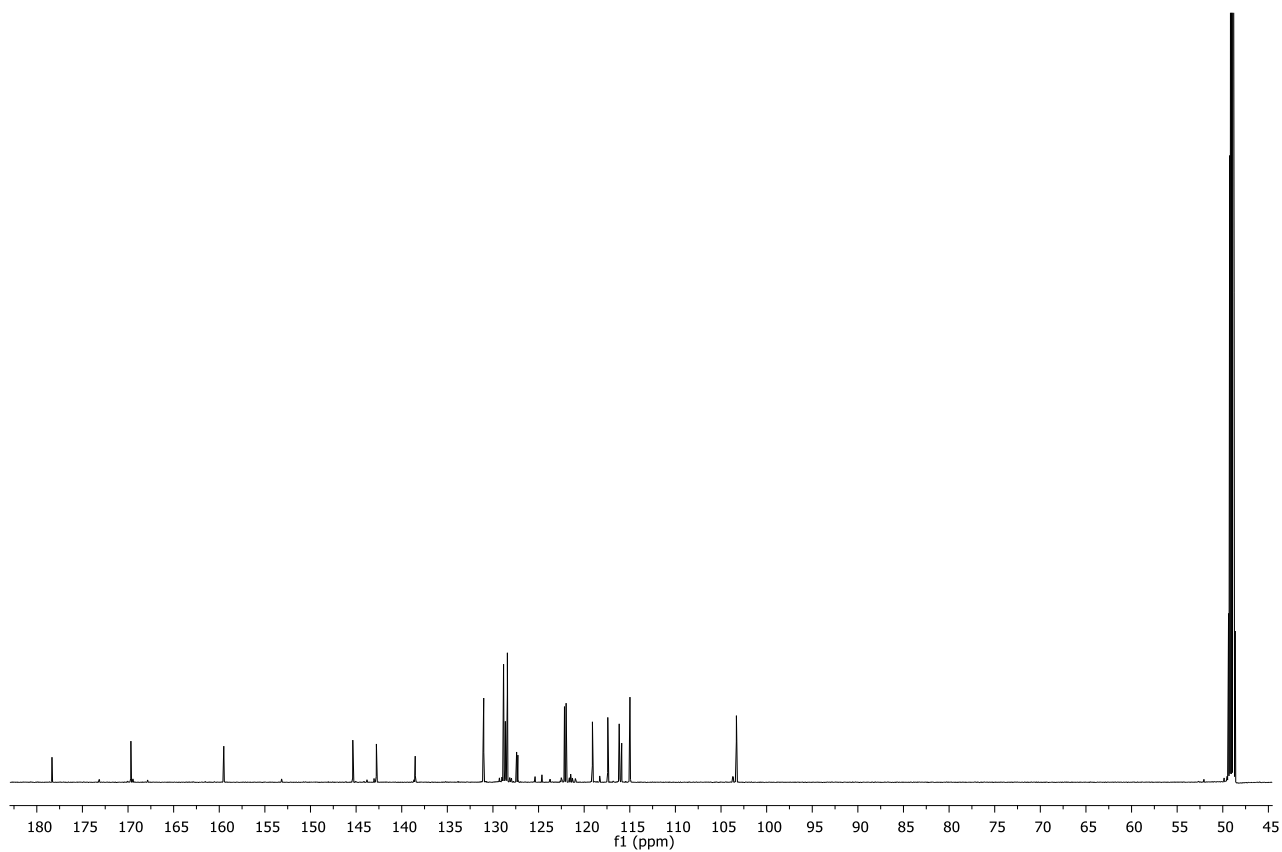

$^1\text{H}$  NMR of compound **15** (700 MHz,  $\text{CD}_3\text{OD}$ )

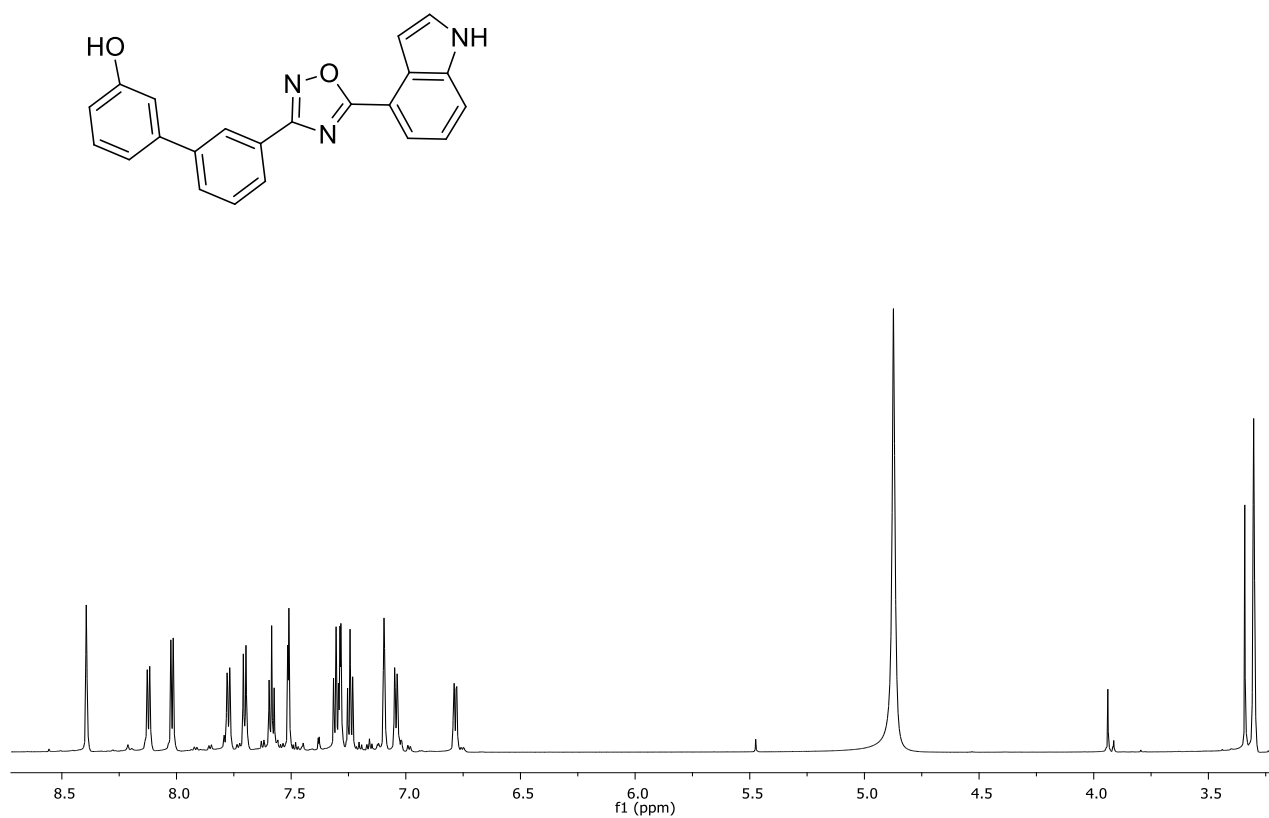

$^{13}\text{C}$  NMR of compound **15** (175 MHz,  $\text{CD}_3\text{OD}$ )

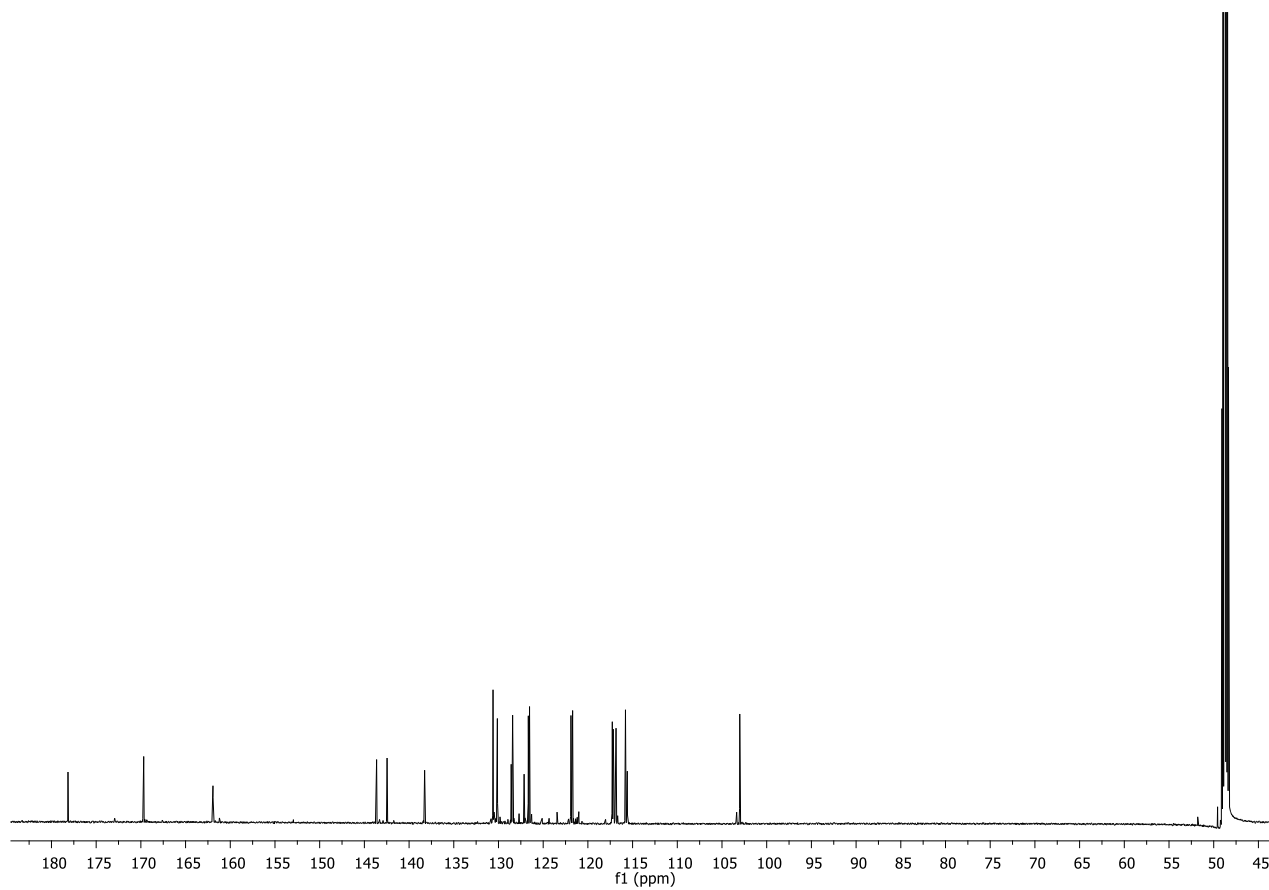

$^1\text{H}$  NMR of compound **16** (400 MHz,  $\text{CDCl}_3$ )

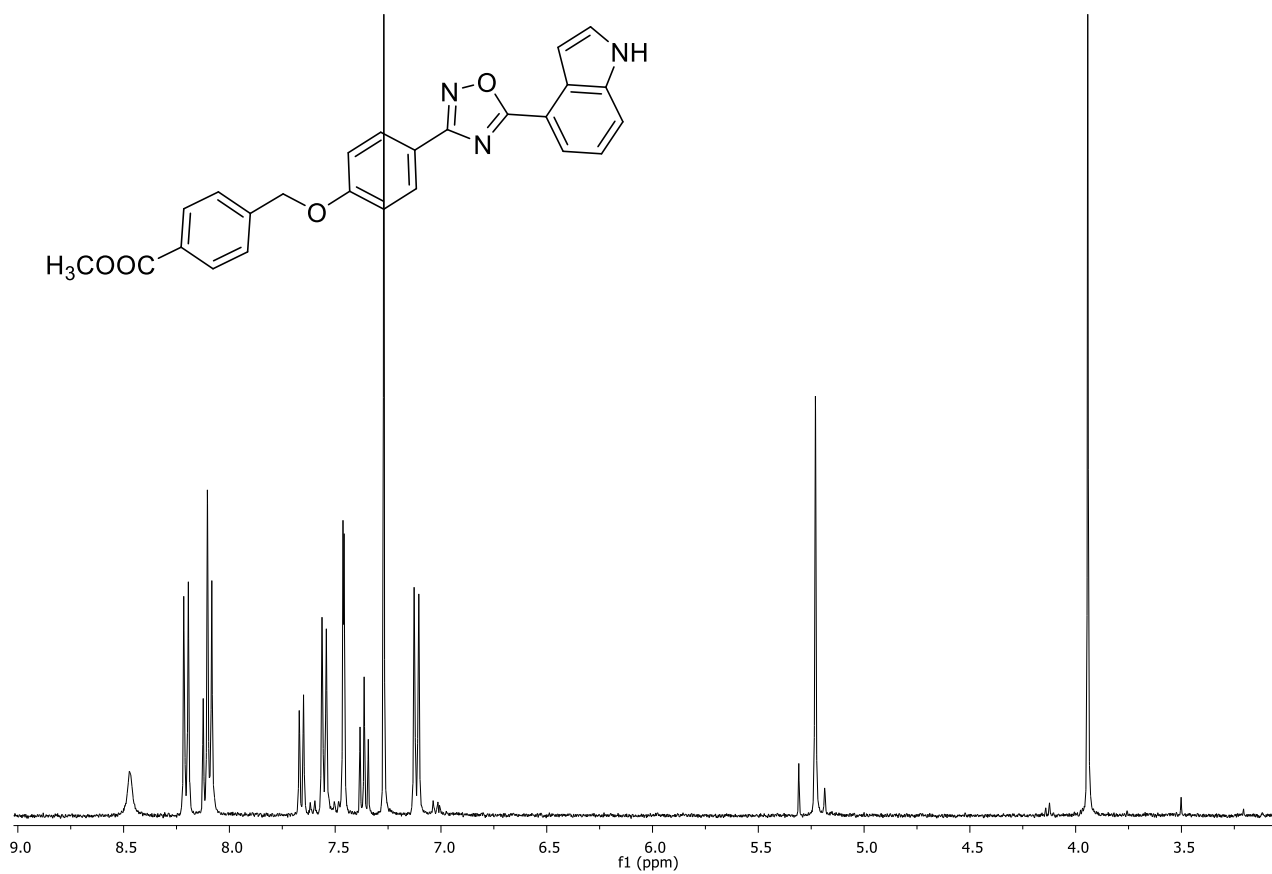

$^{13}\text{C}$  NMR of compound **16** (100 MHz,  $\text{CDCl}_3$ )

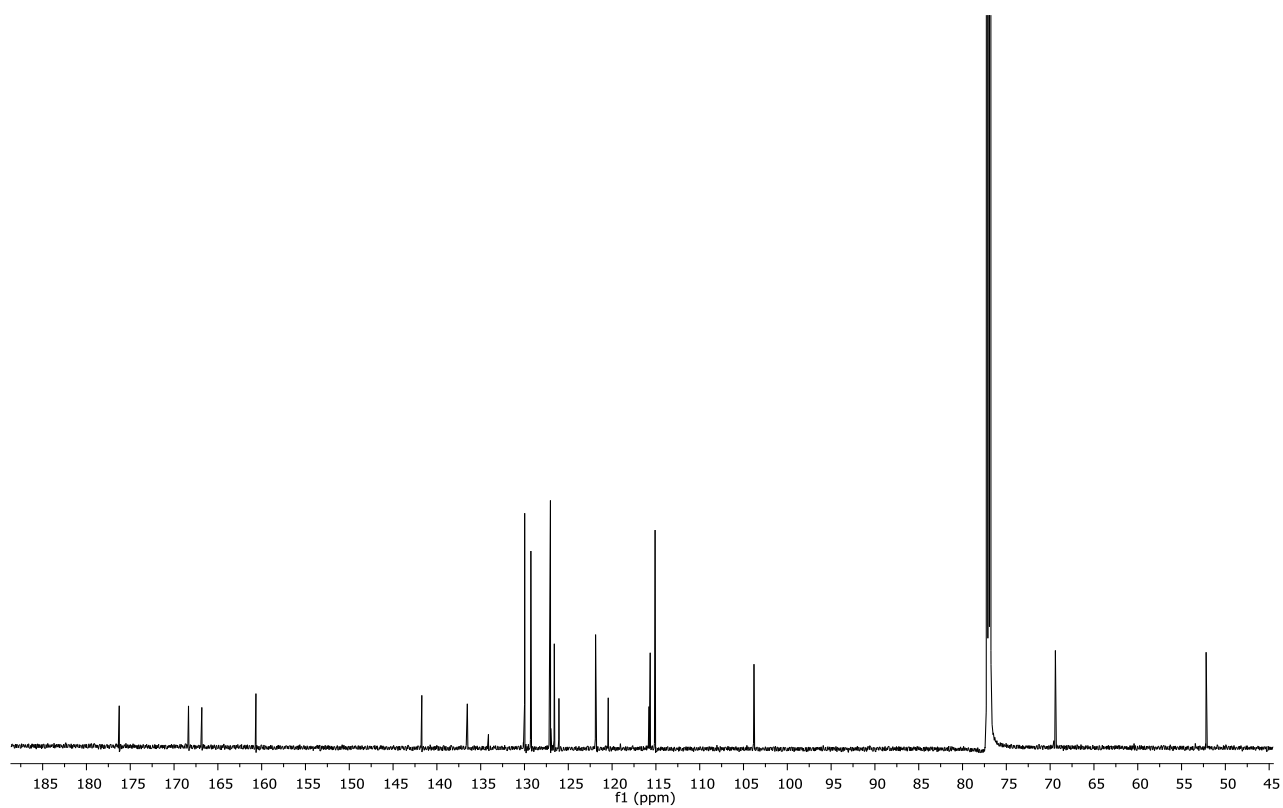

$^1\text{H}$  NMR of compound **17** (400 MHz,  $\text{CDCl}_3$ )

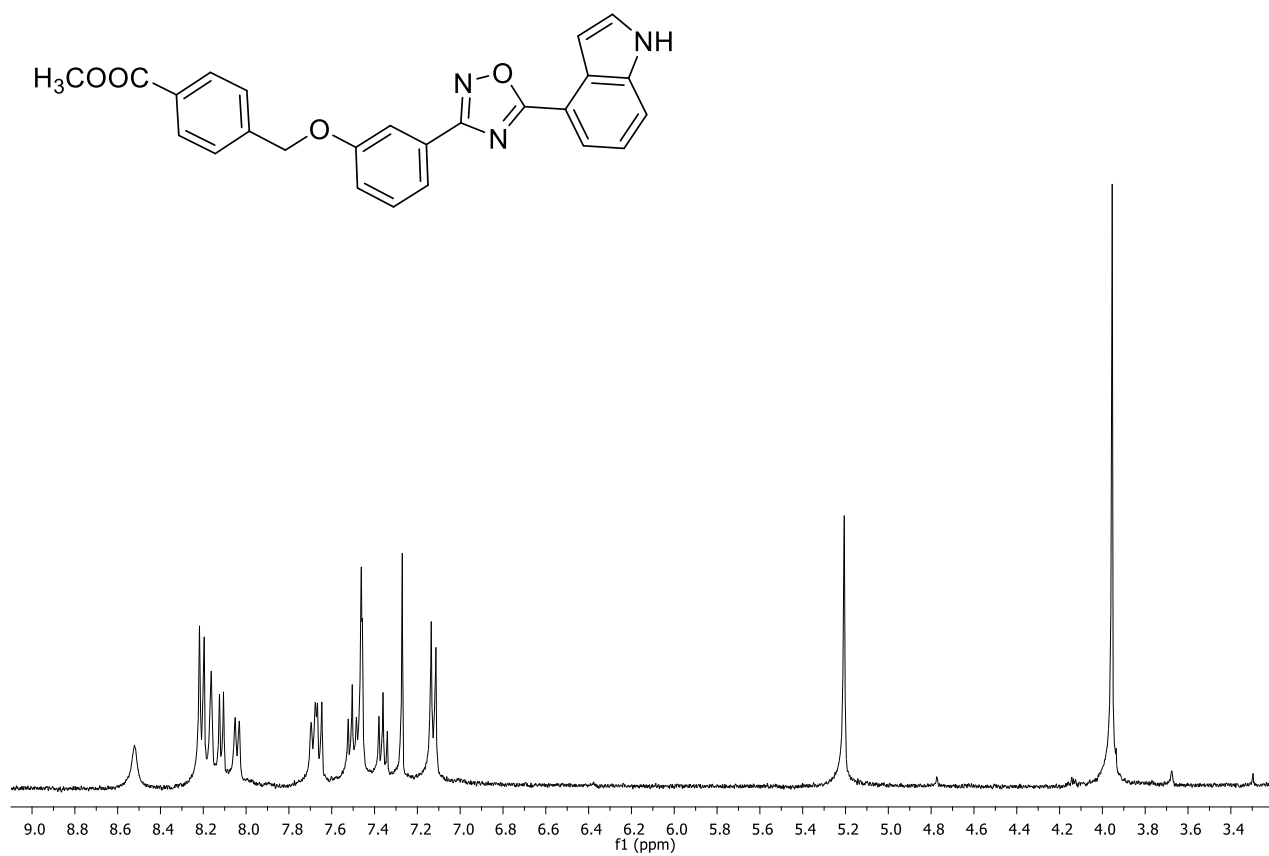

$^{13}\text{C}$  NMR of compound **17** (100 MHz,  $\text{CDCl}_3$ )

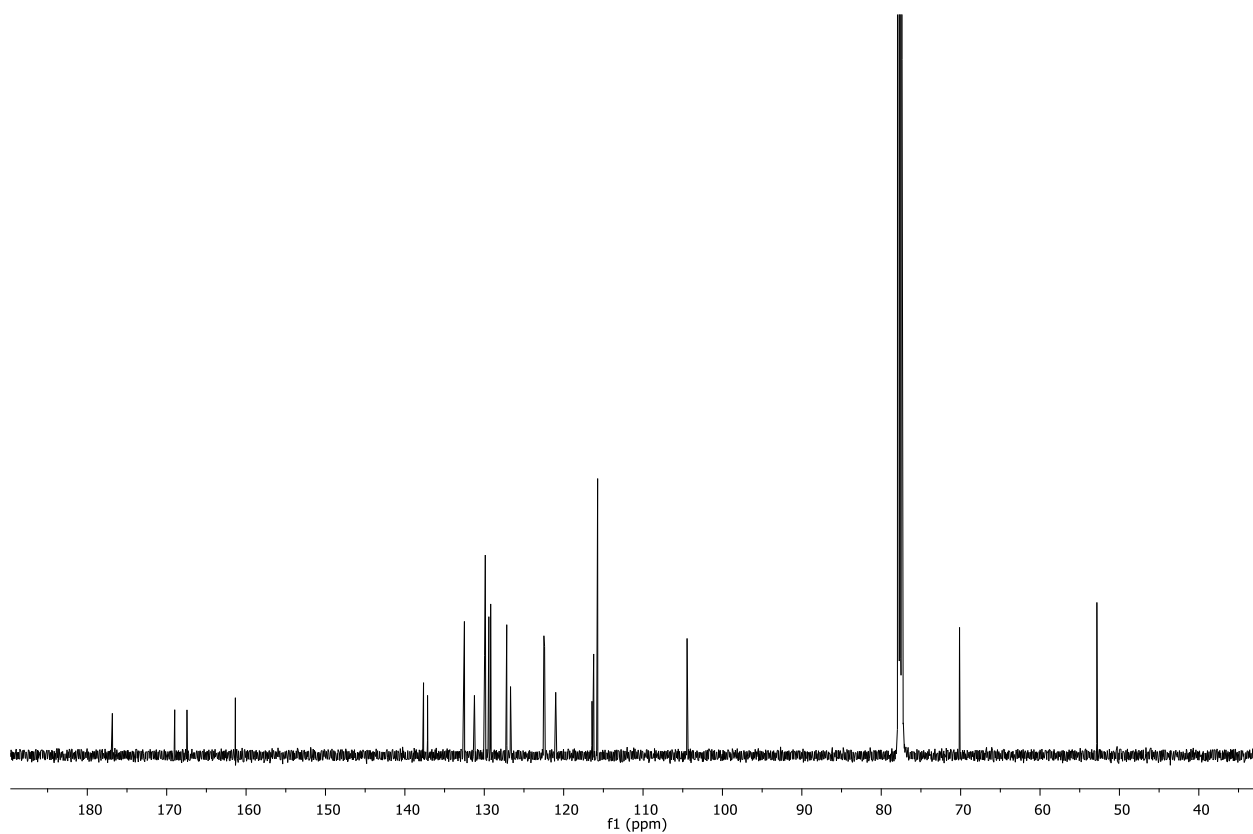

Supplement: s1 [file s1]
